# Supplementary material for: MicroRNA-451 Inhibits Migration of Glioblastoma while Making It More Susceptible to Conventional Therapy
Source: PubMed Central journal article supplement (PMC6468936; doi:10.3390/ncrna5010025), 2019-03-15

Supplementary materials:

**Supplementary Figure 1: The expression of miR-451 is variable in primary GBM cells.** NG – neuroglia; GBM 12 carrying either control (NC) or miR-451 expressing vector. Ct values of qRT-PCR are shown.

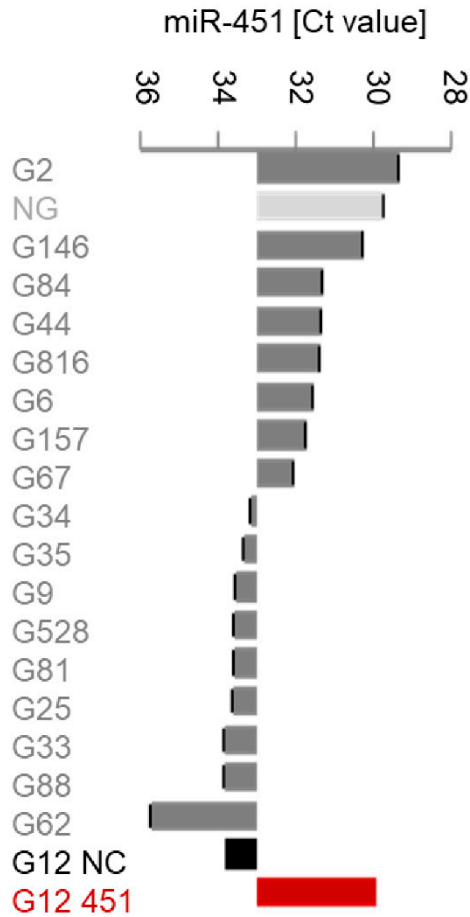



**Supplementary Figure 3.** AMPK network is the most prominent among 91 targeted genes (see Figure 5. (STRING software). Experimentally validated miR-451 targets are indicated by solid black line.

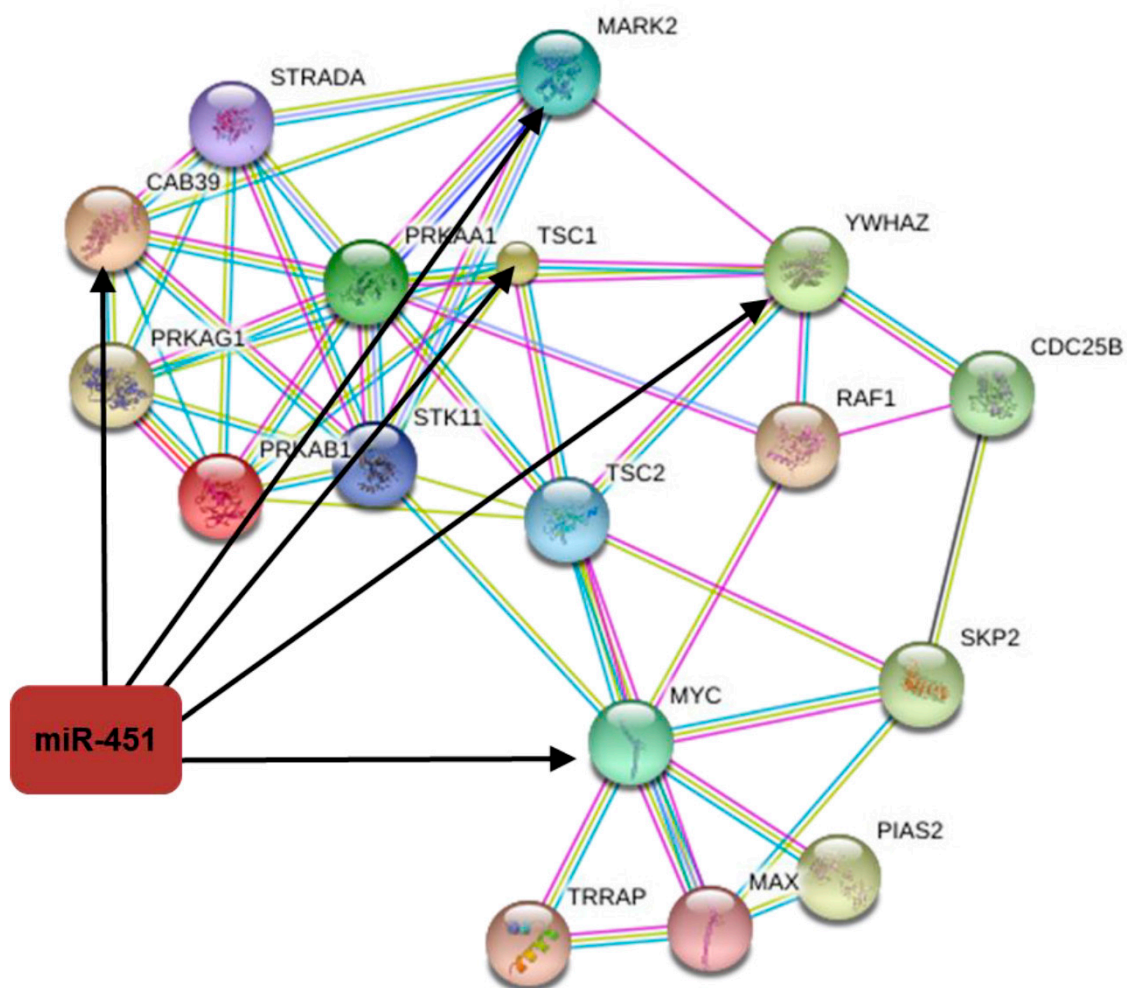

Supplement: ncrna-05-00025-s001.pdf [file ncrna-05-00025-s001.pdf]
